# Supplementary material for: Perturbing phytoplankton: response and isotopic fractionation with changing carbonate chemistry in two coccolithophore species
Source: Copernicus journal article supplement (doi:10.5194/cp-6-771-2010), 2010-12-01
Supplement: Supplementary file 1 [file Rickabycp-2010-8Supplementaryfile.xls]

## Sheet: CbraTPCPOCPON
Treatment	Treatment	AVG HCO3- (µmol Kg-1]	AVG CO32- (µmol Kg-1]	AVG pCO2 (µatm]	AVG CO2 (µmol kg-1]	AVG pH (NBS)	AVG Omega	TPC raw µg	POC raw µg	13C-TPC	13C-POC	PONtpc raw µg	PONpoc raw µg	Blank TPC µg	Blank POC µg	Blank PON µg	TPC µg	POC µg	PONtpc µg	PONpoc µg	TPC pg ml-1	POC pg ml-1	PONtpc pg ml-1	PONpoc pg ml-1	Cells ml-1 (as counted by CC)	µ d-1 (CC)	Cells ml-1 (LM counts)	µ d-1 (LM counts)	TPC pg cell-1	POC pg cell-1	PONtpc pg cell-1	PONpoc pg cell-1	PIC pg cell-1	PIC/POC	POC/PON	POC/PONtpc	TPCprod pg cell-1	POCprod pg cell-1	PONtpcprod pg cell-1	PONpocprod pg cell-1	PICprod pg cell-1	d13C-DIC t0 (0/00)	d13C-DIC tfin (0/00)	d13C-CO2 (0/00)	ep_CO2	%collapsed sphers	N_intact spheres	N_collapsed spheres	%blocky morphologies (malformation)
200A	200	1016.15	77.3	261.95	9.1	8.11085	1.885	361.3	165.7	-18.5	-26.5	23.4	23.7	4.2		0.8	358.275	163.825	23.025	23.35	1.02364e+06	468071	65785.7	66714.3	1803	0.616047	2355	0.672711	434.668	198.756	27.9345	28.3288	183.621	0.729837	8.93858	9.02612	292.406	133.706	18.7918	19.0571	123.524	-7.25	-6.49	-18.3631	6.98026	14.0575	269	44	10.1626
	200	1016.15	77.3	261.95	9.1	8.11085	1.885	362.2	252.8	-18.3	-21.8	23.3	23.4	3.1		0.6	359.175	250.925	22.925	23.05	1.02621e+06	716929	65500	65857.1	1803	0.616047	2355	0.672711	435.76	304.428	27.8132	27.9648					293.14	204.792	18.7102	18.8122				-18.3631	2.74336
200B	200	1066.4	53.55	420.15	14.6	7.91935	1.305	437	301.9	-18.4	-21.7	29.1	28.8	2.4		0.1	433.975	300.025	28.725	28.45	1.23993e+06	857214	82071.4	81285.7	2106	0.567662	3170	0.673572	391.145	270.415	25.89	25.6422	113.79	0.410402	10.775	10.6169	263.464	182.144	17.4388	17.2719	76.6458	-7.25	-6.55	-18.4231	2.517	24.5161	234	76	8.84956
	200	1066.4	53.55	420.15	14.6	7.91935	1.305	436.8	317.1	-18.7	-21.7	29.6	29	2.4		0	433.775	315.225	29.225	28.65	1.23936e+06	900643	83500	81857.1	2106	0.567662	3170	0.673572	390.964	284.114	26.3407	25.8224					263.343	191.372	17.7424	17.3933				-18.4231	2.48795
280A	280	1429.45	114.9	335.8	11.7	8.1385	2.805	285	323*	-18.2	-22.4	18.6	26.1		2	0.4	281.975		18.225	25.75	805643		52071.4	73571.4	1257	0.611401	1540	0.643233	523.145		33.8126	47.7737	234.601	0.774223	7.35698	8.74565	336.504		21.7494	30.7296	150.903	-7.18	-6.89	-18.7631		18.0328	250	55	12.369
	280	1429.45	114.9	335.8	11.7	8.1385	2.805	300.6	165.2	-18	-22.9	19.5	19		1.2	0.3	297.575	163.325	19.125	18.65	850214	466643	54642.9	53285.7	1257	0.611401	1540	0.643233	552.087	303.015	35.4824	34.6011					355.121	194.909	22.8234	22.2566				-18.7631	3.55036
280B	280	1442.8	107.1	364.1	12.65	8.1043	2.61	289,3*	229.7	-18	-22.1	18,3*	21.3		1	0.4		227.825		20.95		650929		59857.1	1544.5	0.604361	2253	0.643412		288.916		26.5678	159.216	0.534198	11.1123	10.5274		185.892		17.094	102.442	-7.18	-6.81	-18.6831	2.77863	19.0164	247	58	15.3333
	280	1442.8	107.1	364.1	12.65	8.1043	2.61	363.6	244.1	-18.1	-21.7	22.7	21.7		3.3	0.3	360.575	242.225	22.325	21.35	1.03021e+06	692071	63785.7	61000	1544.5	0.604361	2253	0.643412	457.263	307.178	28.3115	27.075					294.209	197.642	18.2159	17.4204				-18.6831	2.42495
380A	380	1934.65	141.05	497.25	17.3	8.09645	3.44	370.6	234.17	-17.4	-23.27	22.5	24.9				367.575	232.295	22.125	24.55	1.05021e+06	663700	63214.3	70142.9	2103	0.636811	2566	0.67079	409.281	258.652	24.6353	27.3355	151.576	0.586022	9.46212	10.2899	274.541	173.501	16.5251	18.3364	101.675	-7.22	-			21.5686	240	66	17.4393
	380	1934.65	141.05	497.25	17.3	8.09645	3.44	372.3		-17.4		23.4		3.025		0.375	369.275		23.025		1.05507e+06		65785.7		2103	0.636811	2566	0.67079	411.174		25.6375						275.811		17.1973
380B	380	1942.8	131.45	539.65	18.75	8.06275	3.205	347.4	219.68	-17.2	-24.23	22	26.78		1.875	0.35	344.375	217.805	21.625	26.43	983929	622300	61785.7	75514.3	1892.5	0.621328	2120	0.660864	464.117	293.538	29.1442	35.6199	180.681	0.612841	7.27623	9.93235	306.719	193.989	19.2604	23.54	119.405	-7.22	-6.7	-18.5731	4.63801	16.8196	272	55	16.0173
	380	1942.8	131.45	539.65	18.75	8.06275	3.205	364.3	221.59	-17.3	-24.18	22.8	34.05				361.275	219.715	22.425	33.7	1.03221e+06	627757	64071.4	96285.7	1892.5	0.621328	2120	0.660864	486.894	296.112	30.2224	45.4178					321.771	195.69	19.9729	30.015				-18.5731	4.58983
950A	950	4906.75	353.55	1286.3	44.7	8.0904	8.625	267.7	155.7	-19.5	-26.8	24.4	22.5				264.675	153.825	24.025	22.15	756214	439500	68642.9	63285.7	1511	0.494081	877	0.474514	862.274	501.14	78.2701	72.1616	341.749	0.661517	7.98866	6.55946	409.161	237.798	37.1402	34.2416	162.165	-7.15	-6.95	-18.8231	6.90221	79.5455	63	245	76.087
	950	4906.75	353.55	1286.3	44.7	8.0904	8.625	265.3	165.2	-19.9	-23.7	24.7	17.9				262.275	163.325	24.325	17.55	749357	466643	69500	50142.9	1511	0.494081	877	0.474514	854.455	532.09	79.2474	57.1754					405.451	252.484	37.604	27.1305				-18.8231	4.18545
950B	950	4886.55	375.6	1189.5	41.3	8.12035	9.16	263.3	156.5	-20	-27.5	24	23.2				260.275	154.625	23.625	22.85	743643	441786	67500	65285.7	1596.5	0.494081	948	0.408445	784.433	466.019	71.2025	68.8668	318.415	0.690185	6.59806	6.38478	320.398	190.343	29.0823	28.1283	130.055	-7.15	-6.97	-18.8431	7.48542	82.9193	55	267	74.3534
	950	4886.55	375.6	1189.5	41.3	8.12035	9.16	260.2	153.4	-19.7	-27.8	24.7	23.9				257.175	151.525	24.325	23.55	734786	432929	69500	67285.7	1596.5	0.494081	948	0.408445	775.09	456.676	73.3122	70.9765					316.582	186.527	29.944	28.99				-18.8431	7.76564
1400A	1400	7167.55	515.05	1868.1	64.9	8.0901	12.555	310.9	193.6	-20.9	-27.8	31.1	29.7				307.875	191.725	30.725	29.35	879643	547786	87785.7	83857.1	2059	0.51																-7.1	-6.95	-18.8231	7.52085	98.0892	6	308	90.932
	1400	7167.55	515.05	1868.1	64.9	8.0901	12.555	308.2	188.4	-20.9	-28.3	30.3	29.2				305.175	186.525	29.925	28.85	871929	532929	85500	82428.6	2059	0.51																		-18.8231	7.97449
1400B	1400	7168.25	526.75	1827.55	63.45	8.09985	12.84	298.5	207.1	-21	-27.9	29	30.4				295.475	205.225	28.625	30.05	844214	586357	81785.7	85857.1	1657	0.569401	667	0.274548	1265.69	879.096	122.617	128.721	426.858	0.499061	6.78014	6.89129	347.493	241.354	33.6644	35.3402	117.193	-7.1	-7.53	-19.4031	7.03909	95.122	16	312	88.5033
	1400	7168.25	526.75	1827.55	63.45	8.09985	12.84	306.2	196	-21.3	-28	29.7	29.2				303.175	194.125	29.325	28.85	866214	554643	83785.7	82428.6	1657	0.569401	667	0.274548	1298.67	831.549	125.616	123.581					356.548	228.3	34.4876	33.929				-19.4031	7.18803
Red=10 or more % difference between duplicates
Blue=remarks in labbook
Red*=excluded
Coccolithus braarudii TPC, POC, POC, stable carbon isotopes, PON
Growth rates (coulter counter (CC) and manual microscopy counts)
%collapsed spheres and %malformation

## Sheet: GoTPCPOCPON
Treatment	Treatment	AVG HCO3- (µmol Kg-1]	AVG CO32- (µmol Kg-1]	AVG pCO2 (µatm]	AVG CO2 (µmol kg-1]	AVG pH (NBS)	AVG Omega	TPC raw µg	POC raw µg	13C-TPC	13C-POC	PONtpc raw µg	PONpoc raw µg	Blank TPC µg	Blank POC µg	Blank PON µg	TPC µg	POC µg	PONtpc µg	PONpoc µg	TPC pg ml-1	POC pg ml-1	PONtpc pg ml-1	PONpoc pg ml-1	Cells ml-1	µ d-1	TPC pg cell-1	POC pg cell-1	PONtpc pg cell-1	PONpoc pg cell-1	PIC pg cell-1	PIC/POC	POC/PON	TPCprod pg cell-1	POCprod pg cell-1	PONtpcprod pg cell-1	PONpocprod pg cell-1	PICprod pg cell-1	d13C-DIC t0	d13C-DIC tfin	d13C-CO2 (0/00)	ep_CO2
200A	200	1010.3	83.6	248	8.6	8.1428	2.035	299.9	154.9	-18.6	-25.8	21.2	18.5	3.2		2.3	297.325	152.675	19.825	16.9	849500	436214	56642.9	48285.7	13536	0.861768	62.7586	32.2262	4.18461	3.56721	30.8912	0.975179	8.88018	54.0833	27.7715	3.60616	3.0741	26.621	-7.25	-6.7	-16.7418	9.29813
	200	1010.3	83.6	248	8.6	8.1428	2.035	298.1	149.7	-18.5	-26.3	21.1	18.5	3		2.4	295.525	147.475	19.725	16.9	844357	421357	56357.1	48285.7	13536	0.861768	62.3786	31.1286	4.1635	3.56721				53.7559	26.8257	3.58797	3.0741				-16.7418	9.81641
200B	200	1087.75	55.15	421.25	14.6	7.9276	1.345	295	180.6	-19	-25	19.8	20.8	2.2		0.4	292.425	178.375	18.425	19.2	835500	509643	52642.9	54857.1	12650	0.897727	66.0474	40.288	4.16149	4.33653	27.013	0.697071	9.19973	59.2926	36.1676	3.73588	3.89302	24.2503	-7.25	-6.7	-16.7418	8.46999
	200	1087.75	55.15	421.25	14.6	7.9276	1.345	292.5	167	-18.5	-25.4	20.8	19.7	1.9		0.4	289.925	164.775	19.425	18.1	828357	470786	55500	51714.3	12650	0.897727	65.4828	37.2163	4.38735	4.08809				58.7857	33.41	3.93864	3.66999				-16.7418	8.88389
280A	280	1425.25	117.9	327.15	11.4	8.1504	2.875	283.1	133.7	-18.6	-26.4	20.4	16.8		1.3	0.6	280.525	131.475	19.025	15.2	801500	375643	54357.1	43428.6	11141	0.830971	71.9415	33.7172	4.87902	3.89809	34.5314	0.933611	8.90278	59.7813	28.018	4.05432	3.2392	28.6946	-7.18	-6.93	-16.9718	9.68389
	280	1425.25	117.9	327.15	11.4	8.1504	2.875	279.8	159.2	-18.7	-25.6	20.2	18.8		1.7	0.5	277.225	156.975	18.825	17.2	792071	448500	53785.7	49142.9	11141	0.830971	71.0952	40.2567	4.82773	4.41099				59.078	33.4522	4.0117	3.66541				-16.9718	8.85492
280B	280	1445.2	105.45	371	12.75	8.0966	2.57	420.8	263.7	-18.7	-23.3	27.6	24.6		2.9	2.6	418.225	261.475	26.225	23	1.19493e+06	747071	74928.6	65714.3	14709	0.806542	81.2379	50.7901	5.09406	4.46762	34.2453	0.739591	11.1131	65.5218	40.9643	4.10857	3.60332	27.6203	-7.18	-6.75	-16.7918	6.6635
	280	1445.2	105.45	371	12.75	8.0966	2.57	413.7	217.5	-18.5	-21.9	27.3	21.5		3	2.7	411.125	215.275	25.925	19.9	1.17464e+06	615071	74071.4	56857.1	14709	0.806542	79.8588	41.816	5.03579	3.86547				64.4094	33.7263	4.06157	3.11766				-16.7918	5.22261
380A	380	1908.1	153.25	450.9	15.65	8.13725	3.735	450.7	288.3	-18.5	-22.9	28	25.1				448.125	286.075	26.625	23.5	1.28036e+06	817357	76071.4	67142.9	14118	0.872601	90.6897	57.8947	5.38826	4.75583	34.5557	0.61715	12.0293	79.1359	50.5189	4.7018	4.14994	30.1533	-7.22	-6.68	-16.7218	6.32303
	380	1908.1	153.25	450.9	15.65	8.13725	3.735	449.3	269.5	-18.4	-23.1	28	24.1	2.575		1.375	446.725	267.275	26.625	22.5	1.27636e+06	763643	76071.4	64285.7	14118	0.872601	90.4064	54.09	5.38826	4.55346				78.8887	47.199	4.7018	3.97335				-16.7218	6.52906
380B	380	1939.15	141.55	497.8	17.3	8.09695	3.45	356.5	220	-18.3	-23.2	24	22.4		2.225	1.6	353.925	217.775	22.625	20.8	1.01121e+06	622214	64642.9	59428.6	19686.7	0.936876	51.3654	31.6059	3.28359	3.01872	19.3605	0.606295	10.6036	48.123	29.6108	3.07631	2.82817	18.1383	-7.22	-6.7	-16.7418	6.61163
	380	1939.15	141.55	497.8	17.3	8.09695	3.45	355.5	224.5	-17.9	-23.6	23.2	22.3				352.925	222.275	21.825	20.7	1.00836e+06	635071	62357.1	59142.9	19686.7	0.936876	51.2203	32.259	3.16748	3.00421				47.9871	30.2226	2.96754	2.81457				-16.7418	7.024
950A	950	4889.95	353.7	1126	44.35	8.0921	8.625	472.6	347.9	-18.6	-22.5	30.8	30.3				470.025	345.675	29.425	28.7	1.34293e+06	987643	84071.4	82000	18091	1.09748	74.2319	54.593	4.64714	4.53264	22.4658	0.433722	12.2151	81.4682	59.9149	5.10016	4.97449	24.6558	-7.15	-6.9	-16.9418	5.68618
	950	4889.95	353.7	1126	44.35	8.0921	8.625	473	312.5	-18.5	-22.6	30.6	26.6				470.425	310.275	29.225	25	1.34407e+06	886500	83500	71428.6	18091	1.09748	74.295	49.0023	4.61555	3.94829				81.5375	53.7791	5.06549	4.33318				-16.9418	5.78907
950B	950	4878.6	361.4	1237.5	43	8.10335	8.815	470.7	239.9	-18.8	-23.6	30.8	23.2				468.125	237.675	29.425	21.6	1337500	679071	84071.4	61714.3	17198	1.25795	77.7707	39.4855	4.88844	3.58846	27.1792	0.550147	11.9909	97.8316	49.6708	6.14942	4.5141	34.1901	-7.15	-6.89	-16.9318	6.82941
	950	4878.6	361.4	1237.5	43	8.10335	8.815	456.4	359.3	-18.4	-22.1	30	29.6				453.825	357.075	28.625	28	1.29664e+06	1.02021e+06	81785.7	80000	17198	1.25795	75.395	59.3217	4.75554	4.6517				94.8431	74.6237	5.98223	5.85161				-16.9318	5.28504
1400A	1400	7183.55	486.7	1993.9	69.25	8.06355	11.865	452.2	291.2	-18.2	-22.6	29.5	25.8				449.625	288.975	28.125	24.2	1.28464e+06	825643	80357.1	69142.9	17146	0.901047	74.9238	48.1537	4.68664	4.03259	33.1856	0.806847	10.0745	67.5099	43.3887	4.22289	3.63356	29.9018	-7.1	-6.92	-16.9618	5.76861
	1400	7183.55	486.7	1993.9	69.25	8.06355	11.865	444.9	206.9	-18.5	-29.5	29.4	26.4				442.325	204.675	28.025	24.8	1.26379e+06	584786	80071.4	70857.1	17146	0.901047	73.7073	34.1062	4.66998	4.13258				66.4138	30.7313	4.20787	3.72365				-16.9618	12.9194
1400B	1400	7159.2	503.55	1907.45	66.25	8.08035	12.275	445.2	263.4	-18.9	-23.2	28.6	23				442.625	261.175	27.225	21.4	1.26464e+06	746214	77785.7	61142.9	18396.7	0.901047	68.743	40.5625	4.22825	3.32358	26.9925	0.641743	11.8007	61.9407	36.5487	3.80985	2.99471	24.3215	-7.1	-6.9	-16.9418	6.40688
	1400	7159.2	503.55	1907.45	66.25	8.08035	12.275	449.2	282.7	-18.6	-23.2	28.9	26.1				446.625	280.475	27.525	24.5	1.27607e+06	801357	78642.9	70000	18396.7	0.901047	69.3643	43.5599	4.27484	3.80504				62.5005	39.2495	3.85184	3.42852				-16.9418	6.40688
Red=10 or more % difference
Blue=remarks
Gephyrocapsa oceanica TPC, POC, POC, stable carbon isotopes, PON
